# Supplementary material for: Poly(vinylbenzyl Pyridinium Salts) as Novel Sorbents for Hazardous Metals Ions Removal
Source: MDPI journal article supplement (doi:10.3390/molecules27051723), 2022-03-06
Supplement: s1 [file s1]

**Table S1.** Kinetic parameters of Pb(II), Cd(II), Zn(II), Cu(II) and Ni(II) sorption kinetics on the fabricated resins as determined by fitting with the selected models.

| Isotherm model                       | VBC – D3EI |        |        |        |        | VBC-D4EI |        |        |        |        | VBBr-D3EI |        |        |        |        | VBBr – D4EI |        |        |        |        |
|--------------------------------------|------------|--------|--------|--------|--------|----------|--------|--------|--------|--------|-----------|--------|--------|--------|--------|-------------|--------|--------|--------|--------|
|                                      | Pb(II)     | Cd(II) | Zn(II) | Cu(II) | Ni(II) | Pb(II)   | Cd(II) | Zn(II) | Cu(II) | Ni(II) | Pb(II)    | Cd(II) | Zn(II) | Cu(II) | Ni(II) | Pb(II)      | Cd(II) | Zn(II) | Cu(II) | Ni(II) |
| $q_{\text{exp}}$ (mg/g)              | 32.8       | 35.3   | 26.8   | 33.0   | 25.1   | 32.7     | 38.8   | 24.3   | 33.7   | 20.5   | 39.2      | 43.2   | 25.4   | 30.7   | 21.6   | 34.8        | 44.6   | 22.7   | 30.8   | 19.8   |
| Pseudo-first order                   |            |        |        |        |        |          |        |        |        |        |           |        |        |        |        |             |        |        |        |        |
| $k_1$ (min <sup>-1</sup> )           | 0.023      | 0.027  | 0.026  | 0.035  | 0.066  | 0.024    | 0.037  | 0.023  | 0.034  | 0.055  | 0.029     | 0.037  | 0.031  | 0.034  | 0.037  | 0.022       | 0.037  | 0.039  | 0.027  | 0.049  |
| $q_e$ (mg/g)                         | 32.8       | 35.3   | 26.8   | 33.0   | 25.1   | 32.7     | 38.7   | 24.3   | 33.8   | 20.6   | 39.2      | 43.2   | 25.4   | 30.7   | 21.6   | 34.8        | 44.8   | 22.7   | 30.8   | 19.8   |
| $R^2$                                | 0.908      | 0.837  | 0.719  | 0.876  | 0.854  | 0.996    | 0.839  | 0.981  | 0.866  | 0.695  | 0.936     | 0.935  | 0.952  | 0.855  | 0.905  | 0.535       | 0.661  | 0.760  | 0.742  | 0.693  |
| Pseudo-second order                  |            |        |        |        |        |          |        |        |        |        |           |        |        |        |        |             |        |        |        |        |
| $k_2$ (g/mg min)                     | 0.327      | 0.152  | 0.127  | 0.028  | 0.018  | 0.159    | 0.024  | 0.096  | 0.039  | 0.014  | 0.024     | 0.019  | 0.019  | 0.046  | 0.012  | 0.472       | 0.037  | 0.039  | 0.065  | 0.016  |
| $q_e$ (mg/g)                         | 32.4       | 35.2   | 26.9   | 33.1   | 25.7   | 32.6     | 38.9   | 24.2   | 33.8   | 20.9   | 39.2      | 43.4   | 25.5   | 30.8   | 21.7   | 34.7        | 44.8   | 23.1   | 30.7   | 20.1   |
| $R^2$                                | 1.000      | 1.000  | 1.000  | 0.999  | 1.000  | 1.000    | 0.999  | 0.999  | 0.999  | 0.999  | 0.999     | 0.999  | 0.999  | 0.999  | 0.999  | 1.000       | 0.999  | 0.999  | 0.999  | 0.999  |
| Intra-particle diffusion             |            |        |        |        |        |          |        |        |        |        |           |        |        |        |        |             |        |        |        |        |
| $k_{ip2}$ (mg/g min <sup>0.5</sup> ) | 1.74       | 1.67   | 1.55   | 1.96   | 2.75   | 1.82     | 2.31   | 1.21   | 2.04   | 1.37   | 2.09      | 2.79   | 1.96   | 1.82   | 2.40   | 1.69        | 2.77   | 1.92   | 1.77   | 1.28   |
| C                                    | 18.9       | 20.5   | 14.5   | 16.7   | 4.85   | 18.3     | 19.6   | 14.5   | 17.0   | 5.5    | 21.6      | 19.8   | 8.6    | 15.8   | 2.6    | 21.6        | 21.9   | 6.6    | 16.3   | 5.8    |
| $R^2$                                | 0.502      | 0.912  | 0.734  | 0.835  | 0.727  | 0.990    | 0.782  | 0.943  | 0.792  | 0.687  | 0.941     | 0.823  | 0.713  | 0.751  | 0.826  | 0.610       | 0.756  | 0.735  | 0.674  | 0.652  |
| Elovich                              |            |        |        |        |        |          |        |        |        |        |           |        |        |        |        |             |        |        |        |        |
| $\alpha$ (mg/g min)                  | 254.0      | 318.3  | 125.9  | 134.9  | 24.0   | 195.8    | 156.5  | 398.3  | 127.1  | 24.2   | 381.2     | 105.3  | 19.8   | 136.5  | 14.9   | 728.8       | 143.0  | 13.1   | 157.4  | 29.9   |
| $\beta$ (g mg)                       | 0.245      | 0.231  | 0.279  | 0.229  | 0.229  | 0.236    | 0.194  | 0.372  | 0.219  | 0.328  | 0.220     | 0.162  | 0.225  | 0.248  | 0.271  | 0.263       | 0.163  | 0.232  | 0.250  | 0.345  |
| $R^2$                                | 0.620      | 0.831  | 0.929  | 0.977  | 0.914  | 0.951    | 0.943  | 0.972  | 0.958  | 0.913  | 0.828     | 0.936  | 0.942  | 0.880  | 0.957  | 0.873       | 0.926  | 0.931  | 0.850  | 0.912  |

**Table S2.** Isotherms parameters of different models for sorption of Pb(II), Cd(II), Zn(II), Cu(II) and Ni(II) sorption kinetics on the fabricated resins as determined by fitting with the selected models.

| Isotherm model                                              | VBC – D3EI           |                      |                      |                      | VBC-D4EI             |                      |                      |                      | VBBr-D3EI            |                      |                      |                      |                      | VBBr – D4EI          |                      |                      |                      |
|-------------------------------------------------------------|----------------------|----------------------|----------------------|----------------------|----------------------|----------------------|----------------------|----------------------|----------------------|----------------------|----------------------|----------------------|----------------------|----------------------|----------------------|----------------------|----------------------|
|                                                             | Pb(II)               | Cd(II)               | Zn(II)               | Ni(II)               | Pb(II)               | Cd(II)               | Zn(II)               | Ni(II)               | Pb(II)               | Cd(II)               | Zn(II)               | Cu(II)               | Ni(II)               | Pb(II)               | Cd(II)               | Zn(II)               | Ni(II)               |
| <i>Langmuir</i>                                             |                      |                      |                      |                      |                      |                      |                      |                      |                      |                      |                      |                      |                      |                      |                      |                      |                      |
| Q <sub>m</sub> (mg/g)                                       | 117.7                | 71.7                 | 156.1                | 39.3                 | 90.9                 | 63.5                 | 201.8                | 26.0                 | 155.5                | 83.8                 | 78.6                 | 38.1                 | 37.7                 | 296.4                | 65.4                 | 34.5                 | 33.7                 |
| K <sub>L</sub> (L/mg)                                       | 0.02                 | 0.03                 | 0.01                 | 0.06                 | 0.03                 | 0.05                 | 0.01                 | 0.09                 | 0.03                 | 0.02                 | 0.02                 | 0.06                 | 0.04                 | 0.01                 | 0.04                 | 0.06                 | 0.05                 |
| R <sup>2</sup>                                              | 0.997                | 0.999                | 1.000                | 0.999                | 0.993                | 0.999                | 0.995                | 0.998                | 0.999                | 0.999                | 1.000                | 0.992                | 0.998                | 0.999                | 0.997                | 0.999                | 0.999                |
| <i>Freundlich</i>                                           |                      |                      |                      |                      |                      |                      |                      |                      |                      |                      |                      |                      |                      |                      |                      |                      |                      |
| K <sub>F</sub><br>(mg <sup>1-(1/n)</sup> /gL <sup>n</sup> ) | 7.6                  | 7.4                  | 4.2                  | 13.4                 | 10.2                 | 13.9                 | 2.4                  | 14.1                 | 12.5                 | 6.7                  | 5.7                  | 11.7                 | 9.4                  | 4.6                  | 11.2                 | 12.2                 | 8.8                  |
| N                                                           | 1.95                 | 2.38                 | 1.54                 | 5.08                 | 2.39                 | 3.51                 | 1.37                 | 9.29                 | 1.98                 | 2.16                 | 2.10                 | 4.66                 | 4.01                 | 1.32                 | 3.00                 | 5.29                 | 4.09                 |
| R <sup>2</sup>                                              | 0.978                | 0.969                | 0.994                | 0.993                | 0.965                | 0.987                | 0.975                | 0.940                | 0.966                | 0.974                | 0.983                | 0.985                | 0.994                | 0.994                | 0.962                | 0.991                | 0.943                |
| <i>Dubinin-Radushkevich</i>                                 |                      |                      |                      |                      |                      |                      |                      |                      |                      |                      |                      |                      |                      |                      |                      |                      |                      |
| Q <sub>m</sub> (mg/g)                                       | 75.2                 | 53.6                 | 77.3                 | 34.7                 | 67.8                 | 52.5                 | 70.7                 | 23.9                 | 99.9                 | 58.0                 | 53.8                 | 33.6                 | 31.8                 | 105.5                | 53.5                 | 30.7                 | 29.5                 |
| K <sub>DR</sub> (mol <sup>2</sup> /kJ <sup>2</sup> )        | 4.7·10 <sup>-5</sup> | 6.6·10 <sup>-5</sup> | 7.5·10 <sup>-5</sup> | 3.5·10 <sup>-5</sup> | 3.9·10 <sup>-5</sup> | 3.0·10 <sup>-5</sup> | 1.2·10 <sup>-4</sup> | 2.3·10 <sup>-5</sup> | 2.1·10 <sup>-5</sup> | 6.8·10 <sup>-5</sup> | 8.0·10 <sup>-5</sup> | 4.3·10 <sup>-5</sup> | 5.5·10 <sup>-5</sup> | 4.7·10 <sup>-5</sup> | 4.2·10 <sup>-5</sup> | 4.0·10 <sup>-5</sup> | 6.3·10 <sup>-5</sup> |
| R <sup>2</sup>                                              | 0.912                | 0.957                | 0.920                | 0.921                | 0.923                | 0.919                | 0.954                | 0.731                | 0.937                | 0.950                | 0.945                | 0.928                | 0.923                | 0.919                | 0.942                | 0.937                | 0.980                |
